# Supplementary material for: Carbonized polymer dots for the sensitive and selective analysis of chlortetracycline based on the aggregation induced emission
Source: Royal Society of Chemistry journal article supplement (doi:10.1039/d3nj02474a), 2023-01-01
Supplement: d3nj02474a1.pdf [file d3nj02474a1.pdf]

# Carbonized polymer dots for the sensitive and selective analysis of chlortetracycline based on the aggregation induced emission

Tong Shao, Xiaoshuang Wang, Rentian Guan, Suyuan Zeng, Rui Li, Min Hong,

Qiaoli Yue\*

School of Chemistry and Chemical Engineering, Shandong Provincial Key  
Laboratory of Chemical Energy Storage and Novel Cell Technology, Liaocheng  
University, Liaocheng 252059, China

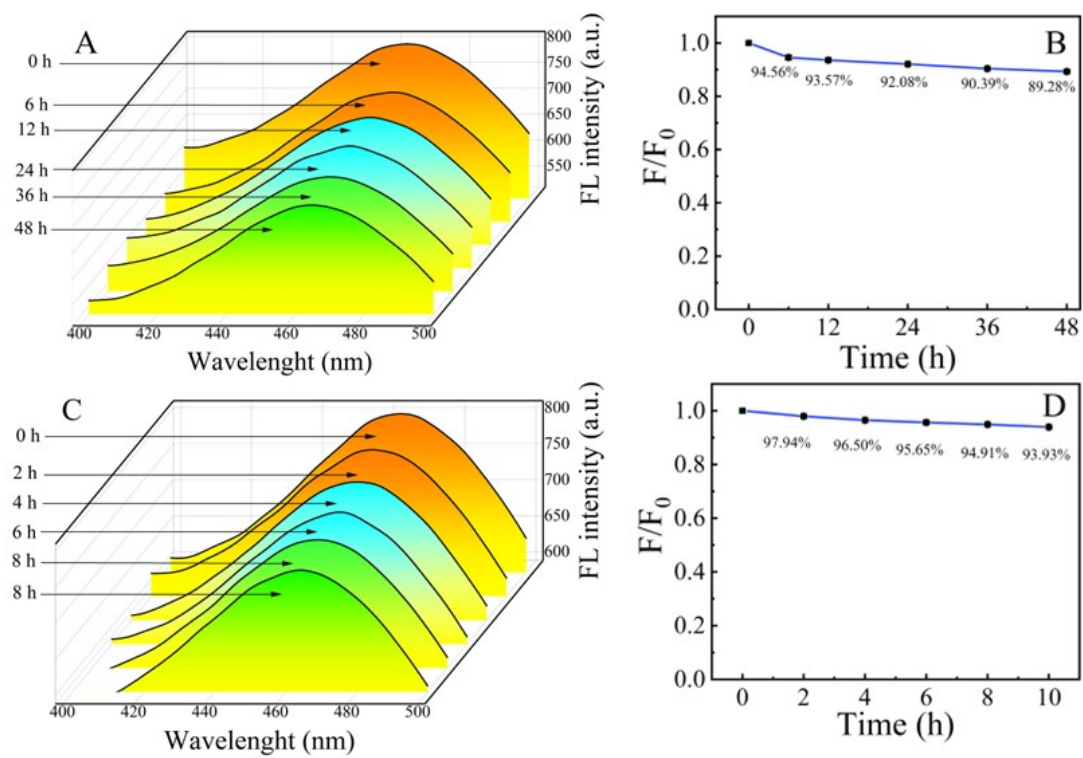

Fig. S1 The stability of CPDs at room temperature (A, B) and illumination with a LED lamp (C, D)

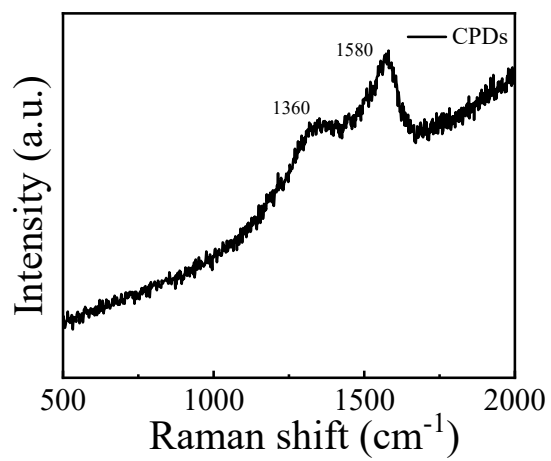

Fig. S2 Raman spectra of CPDs

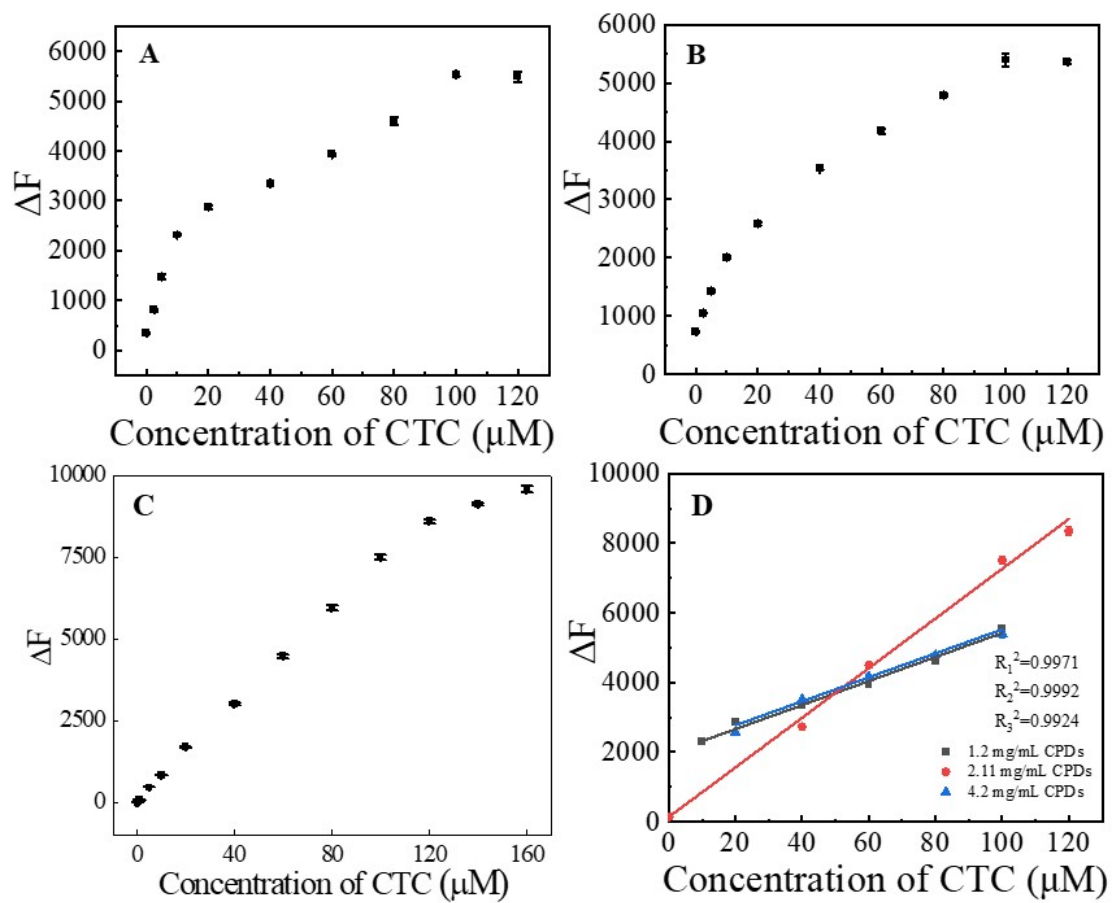

Fig. S3 The response between  $\Delta F$  and concentration of CTC:

(A) 1.2 mg/mL CPDs; (B) 2.11 mg/mL; (C) 4.2mg/mL,

and corresponding linear relationship between  $\Delta F$  and concentration of CTC (D)

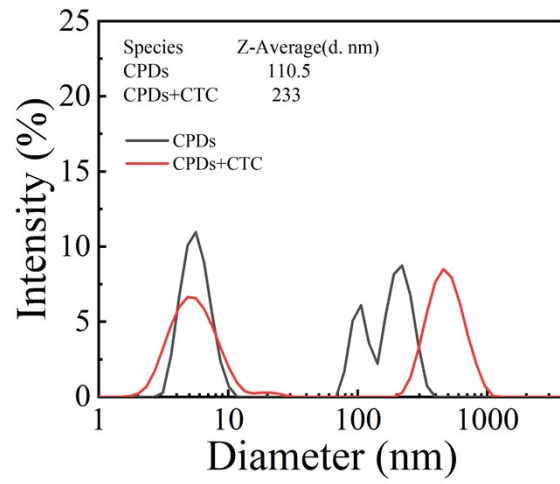

Fig. S4 DLS measurements for the size distribution of CPDs and CPDs+CTC

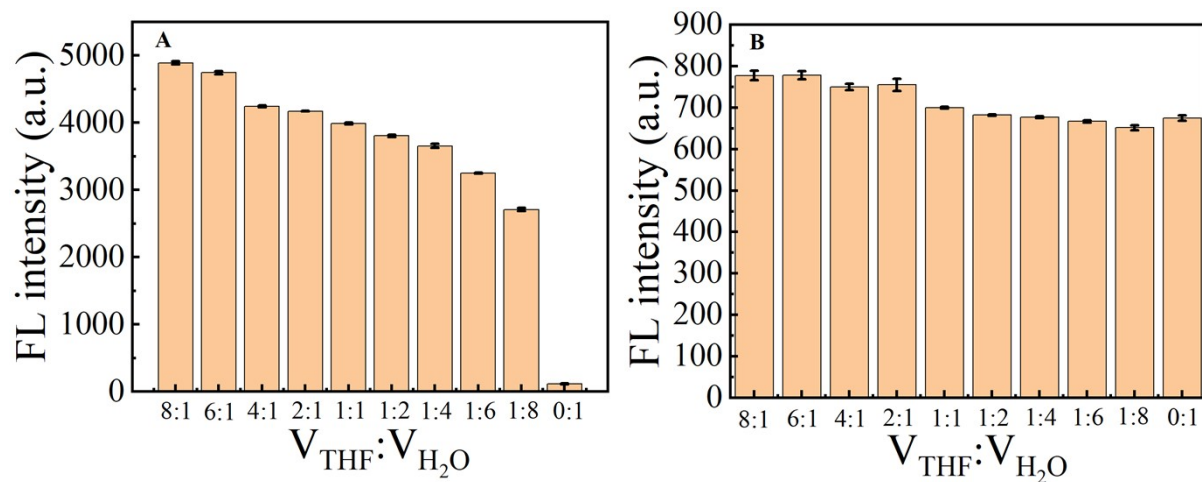

Fig. S5 Fluorescence intensity of CTC (A) and CPDs (B) in the solvent of THF and H<sub>2</sub>O with different ratios

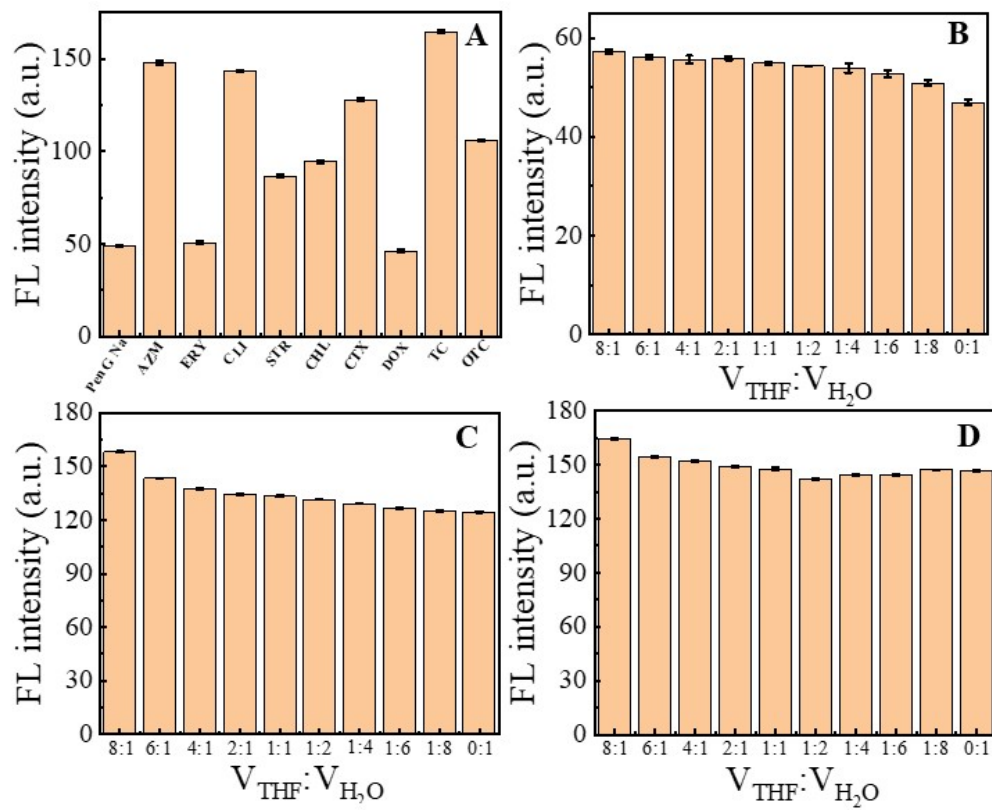

Fig. S6 Fluorescence intensity of other antibiotics (A), DOX (B), OTC (C) and TC (D)

in the solvent of THF and H<sub>2</sub>O with different ratios

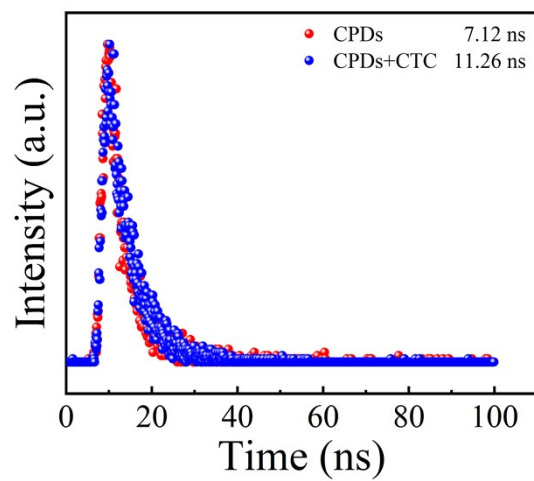

Fig. S7 Fluorescence decay of CPDs and CPDs+CTC



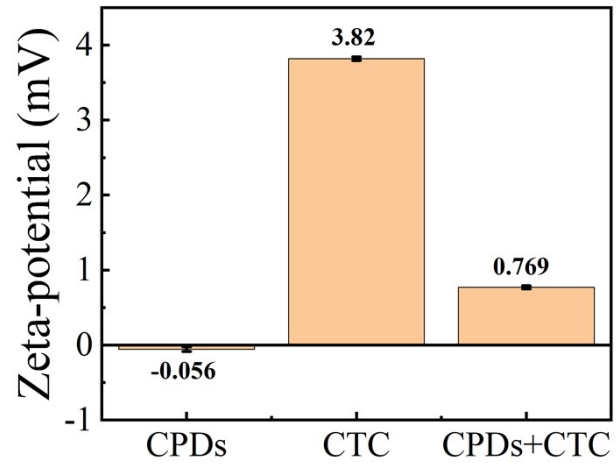

Fig. S8 Zeta potential of CPDs, CTC and CPDs+CTC

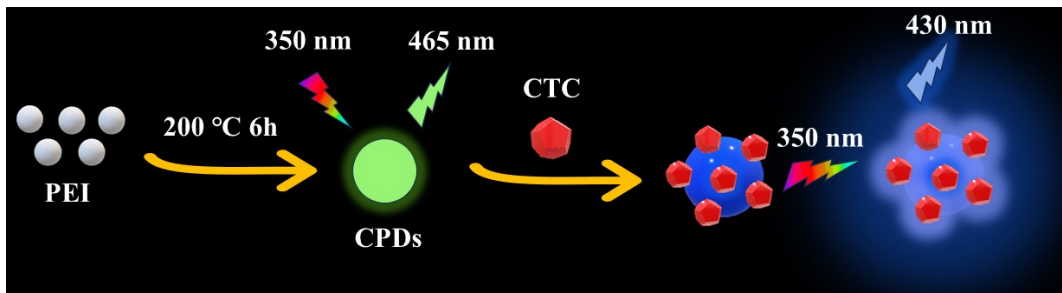

Fig. S9 Schematic illustration of possible reactions between CPDs and CTC
